# Supplementary material for: Identification and validation of a multivariable prediction model based on blood plasma and serum metabolomics for the distinction of chronic pancreatitis subjects from non-pancreas disease control subjects
Source: HighWire-hosted journal article supplement (doi:10.1136/gutjnl-2020-320723), 2021-02-04
Supplement: gutjnl-2020-320723supp001_data_supplement.pdf [file gutjnl-2020-320723supp001_data_supplement.pdf]

1 *Supplement*

2 **Identification and validation of a multivariable prediction model based on blood**  
3 **plasma and serum metabolomics for the distinction of chronic pancreatitis subjects**  
4 **from non-pancreas disease control subjects**

5 M. Gordian Adam<sup>#1,2</sup>, Georg Beyer<sup>#3</sup>, Nicole Christiansen<sup>1,4</sup>, Beate Kamlage<sup>1</sup>, Christian  
6 Pilarsky<sup>5</sup>, Marius Distler<sup>6</sup>, Tim Falbusch<sup>7</sup>, Ansgar Chromik<sup>8</sup>, Fritz Klein<sup>9</sup>, Marcus Bahra<sup>9</sup>,  
7 Waldemar Uhl<sup>7</sup>, Robert Grützmann<sup>5</sup>, F. Ulrich Weiss<sup>10</sup>, Julia Mayerle<sup>#3,10</sup>, and Markus M.  
8 Lerch<sup>#10\*</sup>

9 <sup>1</sup> Metanomics Health GmbH, Tegeler Weg 33, 10589 Berlin, Germany

10 <sup>2</sup> Biocrates AG, Eduard-Bodem-Gasse 8, 6020 Innsbruck, Austria

11 <sup>3</sup> Department of Medicine II, University Hospital, Ludwig-Maximilians-Universität  
12 München, Marchioninistr. 15, 81377 Munich, Germany

13 <sup>4</sup> trinamiX GmbH, Industriestraße 31a, 67063 Ludwigshafen am Rhein, Germany

14 <sup>5</sup> Department of Surgery, University Hospital, Erlangen, Germany

15 <sup>6</sup> Clinic and Outpatient Clinic for Visceral, Thorax, and Vascular Surgery, Medical  
16 Faculty, TU Dresden, Dresden, Germany

17 <sup>7</sup> Ruhr-University Bochum, St. Josef Hospital, Department of Surgery, Bochum,  
18 Germany

19 <sup>8</sup> Asklepios Clinic Harburg, Department for General and Visceral Surgery, Hamburg,  
20 Germany

21 <sup>9</sup> Department of Surgery, Charité Campus Mitte and Charité Campus Virchow Klinikum,  
22 Charité-Universitätsmedizin Berlin, Berlin, Germany

23 <sup>10</sup> Department of Medicine A, University Medicine Greifswald, Ferdinand-  
24 Sauerbruchstrasse, 17475 Greifswald, Germany

25 \* Correspondence:

26 Prof. Dr. med. Markus M. Lerch  
27 Department of Medicine A  
28 University Medicine Greifswald  
29 Ferdinand-Sauerbruchstrasse  
30 17475 Greifswald  
31 Germany

32 Phone: +49 (0) 3834 86 7230

33 Fax: +49 (0) 3834 86 7234

34 [Markus.lerch@med.uni-greifswald.de](mailto:Markus.lerch@med.uni-greifswald.de)

35

## 36 **Suppl. Material and Methods**

### 37 *Study details*

38 We conducted a type 3 study for multivariable prediction for individual prognosis  
39 according to the TRIPOD guidelines [1]. Patients with chronic pancreatitis, liver cirrhosis,  
40 healthy blood donors and preoperative patients with non-pancreatic or liver disease were  
41 consecutively recruited from university referral centers in Greifswald, Dresden, Berlin, and  
42 Bochum, all in Germany.

43 For the identification study, EDTA plasma samples were collected within a case-control  
44 study from 80 patients with CP and 80 non-pancreatic control patients, who underwent  
45 small, non-pancreas-related surgical procedures under general anesthesia (see below).

46 For the first validation study, 144 chronic pancreatitis patients and 204 non-pancreatic  
47 control patients were recruited at three different centers. Because it was acknowledged that  
48 CP patients are relatively young and mostly male, during patient recruitment, special care  
49 was taken to also recruit younger and mostly male patients for the control group with the  
50 aim to achieve a similar average patient age and a similar ratio of male to female subjects  
51 in both groups.

52 In the second validation study, a different sample type was utilized: serum samples  
53 taken from 49 chronic pancreatitis patients, 56 controls, and 57 liver cirrhosis patients were  
54 analyzed. These samples were collected in a fourth independent center. Furthermore, the  
55 control group consisted of healthy blood donors instead of patients waiting to undergo a  
56 small surgery.

57 The key study dates for the three studies were as follows: accrual for the identification  
58 study was started on 2009-01-13, end of accrual was on 2013-08-01. Accrual for the first  
59 validation study was started on 2013-09-09 and ended on 2015-09-28. Accrual for the  
60 second validation study started on 2002-10-23 and ended on 2010-06-10.

61

62 The general inclusion criteria for all groups included written informed consent prior to  
63 any study procedures, age  $\geq 18$  to 85 years and eight hours fasting prior to blood draw.

64 The general exclusion criteria for all groups included type I diabetes, pregnancy or  
65 lactation phase, known viral infections like hepatitis B, hepatitis C, HIV, major surgery within  
66 the last 4 weeks before sample collection, acute anemia (Hb < 9 g/dl or < 5.58 mmol/l),  
67 malignant tumors within the last 5 years.

68 Chronic pancreatitis patients were included if one or more of the following criteria were  
69 met and no other diagnosis was more likely [2, 3, 4]: recurrent bouts of pancreatic pain with  
70 documented rise in amylase or lipase activity for a duration of more than one year plus  
71 radiological evidence supporting the diagnosis, pancreatic calcifications, histological proof

Adam, Beyer et al. FOR PEER REVIEW

3 of 13

72 of chronic pancreatitis, unequivocal changes in pancreatic duct morphology, severely  
73 abnormal pancreatic function tests with maldigestion. Calcifications were identified on CT-  
74 scan, diabetes was diagnosed as suggested by the WHO definition and exocrine  
75 insufficiency was determined by either fecal elastase measurement or concurrent  
76 pancreatic enzyme supplementation. Pancreatitis patients were excluded if they had  
77 undergone pancreatitis surgery within 6 months before sample collection, bile duct stent  
78 placement or surgery, endoscopically assisted pancreatic aspiration <5 days before sample  
79 collection or had known liver cirrhosis.

80 Liver cirrhosis patients were included if preexisting liver cirrhosis had been diagnosed  
81 based on imaging and clinical chemistry. Liver cirrhosis patients were excluded if  
82 concomitant chronic pancreatitis was present.

83 Control patients were included if they were undergoing minor non-pancreatic surgery  
84 under general anesthesia. Control patients were excluded if they had chronic pancreatitis  
85 or liver cirrhosis or if a hernia was due to solid organ transplantation.

86 For the blood donors, only the standard blood donor inclusion criteria applied, i.e. the  
87 donors had to be in good general health, body weight at least 110 pounds. Participants with  
88 diabetes type II were excluded from the blood donor group because of the requirement of  
89 a fasting period of at least 8 hours which was not considered feasible for diabetics.

90

91 From the patients in the non-pancreatic control group in the identification study, 20  
92 patients underwent vascular surgery, 18 patients received a hernia repair, 3 were resected  
93 for goiter and 39 received various other small surgical procedures under general  
94 anesthesia. From the patients in the non-pancreatic control group in the first validation  
95 study, 164 underwent hernia repair surgery and 40 were resected for thyroid goiter. None  
96 were operated in metabolically deranged state. Thus, the data in the first validation study  
97 differed from the identification study as it was a multicentric study, and in the composition  
98 of the non-pancreatic controls. The second validation study differed in the matrix used for  
99 analysis (serum instead of plasma), the center where the samples were obtained, the  
100 control group (healthy blood donors instead of non-pancreatic controls), and the inclusion  
101 of liver cirrhosis patients as an additional control group. Furthermore, 22.5% of the non-  
102 pancreatic controls in the identification study were diabetes type II patients, while 13.5% of  
103 the patients suffered from diabetes type II in the first validation study, and diabetes patients  
104 were excluded as control in the second validation study. As opposed to the identification  
105 study, the genesis of pancreatitis, calcifications, exocrine insufficiency, and enzyme  
106 supplementation were only partially available in the validation studies.

107

108 *Sample Storage*

109 Before freezing, the EDTA plasma samples and serum samples were aliquoted to avoid  
110 freeze-thaw cycles during the measurement period. Samples were stored at the respective  
111 center at -80°C until transport to the measurement location, which occurred on dry ice.  
112 Samples were stored at the measurement location at -80°C until measurement.

113 Our own work has shown that there were no significant differences in the metabolome  
114 of plasma samples due to storage when stored at -80°C for up to 7 years [5]. Even though  
115 the sample collection for one of the studies employed here started in 2003 already, all  
116 samples were measured within 7 years after sample collection. The longest sample storage  
117 time before measurement was 1637 days (about 4.5 years). Thus, a marked influence of  
118 freeze-thaw cycles or sample age on the results of this study can be excluded.

#### 119 *Metabolite profiling details*

120 Briefly, proteins were removed from the samples by precipitation, using three volumes of  
121 acetonitrile. Polar and nonpolar fractions were separated by adding water and a mixture of  
122 ethanol and dichloromethane (2:1, v/v). For GC-MS analysis, the nonpolar fraction was treated  
123 with methanol under acidic conditions to yield the fatty acid methyl esters derived from both  
124 free fatty acids and hydrolyzed complex lipids. The polar and nonpolar fractions were further  
125 derivatized with O-methyl-hydroxylamine hydrochloride to convert oxo-groups to O-methyl-  
126 oximes, and subsequently with N-methyl-N-(trimethylsilyl)trifluoroacetamide prior to analysis.  
127 For LC-MS/MS analysis, both fractions were dried and reconstituted in appropriate solvent  
128 mixtures. High-performance liquid chromatography was performed by gradient elution using  
129 methanol/water/formic acid on reversed phase separation columns. Mass spectrometric  
130 detection technology was applied as described in patent WO2003073464 [6] which allows  
131 targeted and high-sensitivity multiple reaction monitoring (MRM) profiling in parallel to a full  
132 screen analysis. In brief, mass spectrometric detection was performed with repetitive cycles of  
133 MRM transitions for pre-selected metabolites followed by a full scan from a mass-to-charge  
134 ratio of 100 to 1000. The instrument was operated in positive ionization mode for metabolites  
135 in the nonpolar fraction, and in negative ionization mode for metabolites in the polar fraction.  
136 Metabolite identification was done by comparing sample data to authentic standards where  
137 applicable, as outlined previously [7].

138 MxP<sup>®</sup> Lipids covered profiling of sphingolipids (ceramides, sphingomyelins, and  
139 sphingobases). Total lipids were extracted from the sample by liquid/liquid extraction using  
140 chloroform/methanol. The lipid extracts were subsequently fractionated by normal phase liquid  
141 chromatography (NPLC) into different lipid groups according to [8, 9]. The fractions were  
142 analyzed by LC-MS/MS using electrospray ionization (ESI) and atmospheric pressure  
143 chemical ionization (APCI) with detection of specific MRM transitions for preselected  
144 sphingolipids.

145 Metabolite profiling generated semi-quantitative data of metabolite concentrations  
146 calculated by determining metabolite levels in each study sample relative to metabolite  
147 concentrations in reference pool samples that were created from aliquots of all study samples.  
148 The normalization to reference pool samples compensates for inter- and intra-instrumental  
149 variation, i.e. variability that occurs when different analytical sequences were analyzed by  
150 different devices. To allow comparison of data sets between the different studies, the semi-  
151 quantitative data were further normalized to the median of MxPool™ samples representing a  
152 pool of commercial human EDTA plasma containing more than 2,000 different metabolites of  
153 known concentrations. A one-point calibration was used to calculate quantitative absolute  
154 concentrations for those metabolites present in the MxPool. Both types of pooled reference  
155 samples were run in parallel through the entire process.

156

#### 157 *Biomarker selection*

158 The metabolites for the biomarker panel were nominated based on biomedical expertise.  
159 In a first step, features that markedly differentiate CP patients from controls that could have an  
160 influence on the metabolome were considered. CP patients frequently suffer from lipid  
161 malabsorption and gut microbiome changes due to reduced bile acid secretion, reduced  
162 endocrine pancreatic function, pancreatic tissue fibrosis, and pancreatic inflammation. In a  
163 second step, metabolite groups that were expected to be different between CP patients and  
164 controls based on these physiological differences were collected: nutritional lipids that would  
165 be affected from malabsorption, microbiome-derived metabolites that could be affected by gut  
166 microbiome changes, carbohydrate metabolites that that would be affected by the reduced  
167 endocrine function, metabolites that would be altered in response to fibrosis, and metabolites  
168 that would be altered in response to inflammatory processes. In a third step, single  
169 representative metabolites from these groups were chosen for the signature panel based on  
170 methodical experience (the metabolites needed to allow for robust measurements above the  
171 limit of detection), available literature, and experience from previous experiments with CP  
172 patients and controls.

173

#### 174 *Prediction model*

175 One prediction model was employed for all three study cohorts, i.e. the beta coefficients  
176 obtained from the first cohort were then applied to the individuals from the other 2 cohorts.  
177 Our prediction model, consisting of the biomarker signature, the corresponding algorithm,  
178 and the established cut-off, predicts whether a patient suffers from chronic pancreatitis. The  
179 biomarker enables a clinical diagnosis, supporting the standard diagnostic means for

Adam, Beyer et al. FOR PEER REVIEW

6 of 13

180 diagnosis of chronic pancreatitis (see above). The biomarker is not designed to be applied  
181 for screening of the general population.

182 To avoid any bias when analyzing the concentrations of the metabolites present in the  
183 biomarker signature, the diagnosis was blinded to the scientists measuring the samples  
184 using mass spectrometry. The concentration values in the plasma samples of the 8  
185 metabolites present in the biomarker signature are the only predictors used in the prediction  
186 model. Furthermore, the calculation of the biomarker score by the algorithm and selection  
187 of the cut-off was done fully automated, without human interference. After the initial  
188 calculation based on the identification study results, there were no subsequent interventions  
189 like patient exclusions, cut-off optimization, or re-training of the algorithm. Vice versa, the  
190 clinical diagnosis was established in the participating clinical centers according to the  
191 criteria mentioned above before the plasma samples were taken and analyzed in this study.  
192 Thus, the outcome obtained with the prediction model did not have any effect on the clinical  
193 diagnosis.

#### 194 *Statistical analysis details*

195 Power analysis was performed to estimate an adequate sample size using  
196 representative metabolite profiling standard deviations that were determined by  
197 metanomics GmbH in earlier studies. Primary goal of the study was to determine a 20%  
198 metabolic difference on a 5% significance level with approximately 72-99% power on the  
199 basis of the patient samples. Metabolic difference was defined as absolute or relative  
200 difference in concentrations of individual metabolites. Power estimates were based on t-test  
201 statistics.

202 Missing data were handled differently depending on the analysis. For the Naive Bayes  
203 algorithm and the principal component analysis, missing values were imputed with the  
204 NIPALS (Non-linear Iterative Partial Least Squares) algorithm [10]. In the second validation  
205 study, BMI values were not available for all participants. For the inclusion of the BMI as a  
206 confounding factor in the MANOVA, the missing BMI values were imputed using K-means  
207 clustering [11] for this purpose.

208 All R packages used, sorted by analysis step and including the utilized functions, are  
209 listed in supplemental **Table S1**.

210

## 211 **Suppl. Results**

212 Metabolomic analyses details

213 The metabolomics data underwent a strict quality control after which 505 known and  
214 115 unknown metabolites remained for statistical analysis in the datasets based on plasma  
215 samples. Most of these metabolites could also be detected in the study conducted with  
216 serum samples. In this dataset, 498 known and 118 unknown metabolites remained for  
217 statistical analysis that met the quality control criteria.

218 Concentration data were missing for beta-carotin from 2 samples in the second  
219 validation study, for cryptoxanthin in 7 samples from the second validation study, for N-  
220 acetylcytidine in 2 samples from the first and 1 sample from the second validation study, for  
221 behenic acid in 1 sample from the identification study, 6 samples from the first validation  
222 study, and 1 sample in the second validation study, for mannose in 16 samples from the  
223 first validation study and 5 samples from the second validation study, for indole-3-acetic  
224 acid for 1 sample in the identification study, for 28 samples in the first validation study, and  
225 for 7 samples in the second validation study, for hippuric acid for 1 sample in the second  
226 validation study, and for ceramide (d18:1,C24:1) for 1 sample in the first validation study  
227 and 17 samples in the second validation study. Normalized to the number of samples in  
228 each study, this means that a maximum of 1% of the values for a given metabolite were  
229 missing in the identification study, maximally 8% in the first validation study and maximally  
230 10% in the second validation study. There were no cases where the outcome (diagnosis)  
231 was unknown or missing.

232 In total, 60 metabolites were not significantly different ( $p > 0.05$  or  $q > 0.2$ ) between CP  
233 and control groups in any of the three studies. 516 metabolites were significantly different  
234 in some of the studies and 39 metabolites were significantly ( $p < 0.05$  and  $q < 0.2$ ) different  
235 in all of the three studies. 6 of the 8 metabolites from the signature metabolite panel had a  
236 p value below the significance threshold ( $p < 0.05$ ) in all three studies (see **Table 4**). The  
237 other 2 of the 8 metabolites from the panel (behenic acid and indole-3-acetic acid) were  
238 significantly different between the groups in the identification and the first validation study,  
239 but not in the second validation study that had serum as a sample matrix.

240 The panel metabolites were not the best 8 discriminators between CP patients and  
241 controls. Beta-carotene and cryptoxanthin were among the top 3 discriminators in the  
242 plasma-based studies (identification and first validation study), with lycopene being the best  
243 discriminator in the plasma studies. Looking at all three studies together, beta-carotene,  
244 cryptoxanthin, and mannose were among the top 5 discriminators, with 3-hydroxybutyrate  
245 being the best discriminator.

246 The distribution of age and BMI over the biomarker signature score is shown in  
247 supplemental **Figure S1**. The age gap between CP patients and non-pancreatic controls is  
248 markedly higher in the identification study than in the validation. In the first validation study,  
249 the age of the patients follows an even Gaussian distribution for both CP patients and non-

Adam, Beyer et al. FOR PEER REVIEW

8 of 13

250 pancreatic controls. In both studies, the score is markedly higher for CP patients compared  
251 to non-pancreatic controls irrespective of the age. As the BMI was calculated with a decimal,  
252 there are a lot of potential sublevels, which results in more data being needed for Gaussian  
253 curves. Nevertheless, the BMI of non-pancreatic controls in the validation study also follows  
254 a Gaussian distribution, while the BMI of CP patient is clearly skewed due to the increased  
255 frequency of patients with low BMI. This is an inherent feature of the disease concomitant  
256 with the malnutrition caused by CP. These trends can also be observed in the identification  
257 study. Despite the uneven BMI distribution, the graphs show that the biomarker score is  
258 markedly higher for CP patients compared to non-pancreatic controls irrespective of the  
259 BMI.

260 The full prediction model can be used universally. The weighting of the metabolites as  
261 shown in supplemental **Table S2** can be used as coefficients to be multiplied with the  
262 respective concentrations of the eight metabolites in the biomarker signature (in  $\mu\text{mol} / \text{L}$ )  
263 to calculate the biomarker signature score. Whether the score is above or below the cut-off  
264 value of 0.479 determines whether the patient is evaluated as positive or negative for the  
265 diagnosis “chronic pancreatitis”.

266

#### 267 *Effect of exocrine insufficiency and enzyme supplementation on carotenoid levels*

268 Because the identification of beta-carotene and cryptoxanthin suggested a  
269 pathophysiological mechanism of malabsorption, it was analyzed whether pancreatic  
270 exocrine insufficiency and enzyme supplementation had an effect on plasma carotenoid  
271 levels. This analysis was limited to the identification study because the full information was  
272 available for this cohort only. Almost all patients with exocrine insufficiency also received  
273 enzyme supplementation so that a separate comparison of the effect of exocrine  
274 insufficiency alone was not possible. As obvious from **Figure S2**, there was no significant  
275 increase of carotenoid levels in plasma of chronic pancreatitis patients supplemented with  
276 enzymes to treat exocrine insufficiency.

277

#### 278 *Biomarker signature score increases with disease severity*

279 In clinical daily routine, patients that will be tested for chronic pancreatitis are not  
280 always as healthy as the control groups used in this study. We therefore wanted to  
281 investigate whether the biomarker signature score was more accurate in patients with  
282 advanced disease than in less severe cases. Because other clinical data regarding disease  
283 severity was elusive, we used the information whether the patients suffered from pancreatic  
284 endocrine or exocrine insufficiency, which is a good surrogate marker for severity and time

285 since disease onset. 199 chronic pancreatitis patients from the identification and the first  
286 validation study for whom this information was available together were categorized in three  
287 groups: those without insufficiencies, those with either endo- or exocrine insufficiency, and  
288 those with both endo- and exocrine insufficiencies. The distribution of biomarker signature  
289 score values in the three groups is shown in **Figure S3**. The average biomarker signature  
290 score was 0.68 in patients without insufficiencies, 0.78 in patients with either endo-or  
291 exocrine insufficiency, and 0.90 in patients with both endo- and exocrine insufficiency. An  
292 ANOVA was employed to test whether the differences in the biomarker signature score  
293 were significant. While the group with one pancreatic insufficiency did not have a  
294 significantly different score compared to the other groups, the scores of the groups without  
295 pancreatic insufficiencies and with both endo- and exocrine insufficiencies were significantly  
296 different ( $p = 0.0018$ ). This indicates that the biomarker signature score is higher in patients  
297 with more severe pancreatic disease.

298 Using the established cut-off of 0.479, we concluded for each patient in the three groups  
299 whether the diagnosis based on the signature score was correct or a false negative. A  
300 chi-squared test was employed to investigate whether the diagnosis and the severity were  
301 co-dependent. The result of  $p = 0.056$  shows a clear trend towards a higher fraction of  
302 correct diagnoses in more severe cases, although there was no significant dependency  
303 between the group affiliation and the diagnosis.

304

## 305 References

- 306 1 Collins GS, Reitsma JB, Altman DG, Moons KG. Transparent Reporting of a multivariable prediction  
307 model for Individual Prognosis Or Diagnosis (TRIPOD): the TRIPOD Statement. *Br J Surg* 2015;**102**:148-58.
- 308 2 Mayerle J, Hoffmeister A, Werner J, Witt H, Lerch MM, Mossner J. Chronic pancreatitis--definition,  
309 etiology, investigation and treatment. *Dtsch Arztebl Int* 2013;**110**:387-93.
- 310 3 Ito T, Ishiguro H, Ohara H, Kamisawa T, Sakagami J, Sata N, *et al.* Evidence-based clinical practice  
311 guidelines for chronic pancreatitis 2015. *J Gastroenterol* 2016;**51**:85-92.
- 312 4 Whitcomb DC, Shimosegawa T, Chari ST, Forsmark CE, Frulloni L, Garg P, *et al.* International consensus  
313 statements on early chronic Pancreatitis. Recommendations from the working group for the international consensus  
314 guidelines for chronic pancreatitis in collaboration with The International Association of Pancreatology, American  
315 Pancreatic Association, Japan Pancreas Society, PancreasFest Working Group and European Pancreatic Club.  
316 *Pancreatology* 2018.
- 317 5 Wagner-Golbs A, Neuber S, Kamlage B, Christiansen N, Bethan B, Rennefahrt U, *et al.* Effects of Long-  
318 Term Storage at -80 °C on the Human Plasma Metabolome. *Metabolites* 2019;**9**.
- 319 6 Walk TB, Dostler M. Mass Spectrometry Method for Analysing Mixtures of Substances.  
320 2003:PCT/EP2003/001274.
- 321 7 Kamlage B, Neuber S, Bethan B, González Maldonado S, Wagner-Golbs A, Peter E, *et al.* Impact of  
322 Prolonged Blood Incubation and Extended Serum Storage at Room Temperature on the Human Serum  
323 Metabolome. *Metabolites* 2018;**8**.
- 324 8 Christie WW. Rapid separation and quantification of lipid classes by high performance liquid  
325 chromatography and mass (light-scattering) detection. *J Lipid Res* 1985;**26**:507-12.
- 326 9 Schmidt H, Schmidt R, Geisslinger G. LC-MS/MS-analysis of sphingosine-1-phosphate and related  
327 compounds in plasma samples. *Prostaglandins Other Lipid Mediat* 2006;**81**:162-70.

*Adam, Beyer et al.* FOR PEER REVIEW

10 of 13

328 10 Noonan R, Wold H. NIPALS Path Modelling with Latent Variables. Scandinavian Journal of Educational  
329 Research 1977;21:33-61.  
330 11 Gajawada S, Toshniwal D. Missing Value Imputation Method Based on Clustering and Nearest  
331 Neighbours. International Journal of Future Computer and Communication 2012;1:pp. 206-8.  
332

333 **Suppl. Figures and Tables:**

334 **Figure S1.** Distribution of age (A,C) and BMI (B,D) over biomarker signature score in the  
335 identification study (A,B) and the first validation study (C,D). Demographics are shown on the  
336 x axes, the biomarker signature score on the y axes. Stacked columns for age and side-by-  
337 side columns for BMI are colored according to outcome (diagnosis). Horizontal lines / functions  
338 represent Gaussian approximation of the data.

339

340 **Figure S2.** Boxplots of effect of enzyme supplementation on plasma carotenoid levels. Shown  
341 are data for chronic pancreatitis patients of the identification study (plasma). There was no  
342 significant increase of carotenoid levels in plasma of patients supplemented with enzymes to  
343 treat exocrine insufficiency.

344

345 **Figure S3.** Boxplots of biomarker signature scores in chronic pancreatitis patients from the  
346 identification study and the first validation study, which were categorized depending on  
347 whether they suffer from endo- and/or exocrine insufficiencies as a measure of disease stage.  
348 The average biomarker signature score increased with disease severity and this increase was  
349 significant comparing patients without insufficiency and patients with both endo- and exocrine  
350 insufficiency.

351

Adam, Beyer et al. FOR PEER REVIEW

12 of 13

352 **Table S1:** R packages and functions used

| Analysis                    | Packages                                | Functions                                              |
|-----------------------------|-----------------------------------------|--------------------------------------------------------|
| PCA                         | Stats (included in R core pkge)         | prcomp()                                               |
| Biomarker training and test | E1071<br>ROCR<br>ROCR<br>pROC           | naivebayes()<br>performance()<br>prediction()<br>roc() |
| ANOVA/MANOVA                | slme<br>stats (included in R core pkge) | lme()<br>p.adjust()                                    |
| Visualizations              | ggplot2                                 |                                                        |

353

354

Adam, Beyer et al. FOR PEER REVIEW

13 of 13

355

356 **Table S2:** Weightings of all metabolites in the biomarker signature

| Metabolite                 | Weight    | Mean    | SD ±   |
|----------------------------|-----------|---------|--------|
| Beta-carotene              | 1.1749422 | -0.9281 | 0.4641 |
| Cryptoxanthin              | 1.2061438 | -1.1714 | 0.4558 |
| Mannose                    | 0.7865473 | 1.6548  | 0.1678 |
| Behenic acid (C22:0)       | 0.6728898 | 1.5537  | 0.2095 |
| Ceramide (d18:1/<br>C24:1) | 0.6066595 | 0.1294  | 0.1427 |
| Indole-3-acetic acid       | 0.5846360 | -0.0213 | 0.3273 |
| Hippuric acid              | 0.5009786 | -0.3020 | 0.4408 |
| N-Acetylcytidine           | 0.1068720 | 0.0807  | 0.1897 |
|                            |           |         |        |

357 SD: standard deviation

358 **Table S3.** Statistical analysis results (linear model) of the signature metabolites (CP vs.  
359 control) with FDR corrected p-values (q values).

| Dataset (matrix)           | Identification study<br>(plasma) | First validation study<br>(plasma) | Second validation study<br>(serum) |
|----------------------------|----------------------------------|------------------------------------|------------------------------------|
| Metabolite                 | Fold change (q-value)            | Fold change (q-value)              | Fold change (q-value)              |
| Beta-carotene              | 0.37 (9.8 x 10 <sup>-6</sup> )   | 0.38 (1.8 x 10 <sup>-19</sup> )    | 0.47 (0.00039)                     |
| Cryptoxanthin              | 0.40 (9.9 x 10 <sup>-6</sup> )   | 0.38 (4.5 x 10 <sup>-18</sup> )    | 0.48 (0.00090)                     |
| Mannose                    | 1.47 (9.9 x 10 <sup>-6</sup> )   | 1.52 (6.7 x 10 <sup>-27</sup> )    | 2.80 (8.4 x 10 <sup>-13</sup> )    |
| Behenic acid<br>(C22:0)    | 0.72 (0.0080)                    | 0.67 (1.0 x 10 <sup>-15</sup> )    | 1.14 (0.14)                        |
| Ceramide (d18:1,<br>C24:1) | 1.27 (0.0059)                    | 1.28 (1.0 x 10 <sup>-10</sup> )    | 1.96 (5.9 x 10 <sup>-12</sup> )    |
| Indole-3-acetic<br>acid    | 0.63 (0.013)                     | 0.62 (2.4 x 10 <sup>-8</sup> )     | 1.15 (0.40)                        |
| Hippuric acid              | 0.68 (0.15)                      | 0.49 (1.2 x 10 <sup>-7</sup> )     | 0.51 (0.0034)                      |
| N-Acetylcytidine           | 1.22 (0.058)                     | 1.21 (8.1 x 10 <sup>-5</sup> )     | 2.36 (3.2 x 10 <sup>-12</sup> )    |

360 CP: Chronic pancreatitis

361
