# Supplementary material for: Identification and validation of a multivariable prediction model based on blood plasma and serum metabolomics for the distinction of chronic pancreatitis subjects from non-pancreas disease control subjects
Source: HighWire-hosted journal article supplement (doi:10.1136/gutjnl-2020-320723), 2021-02-04

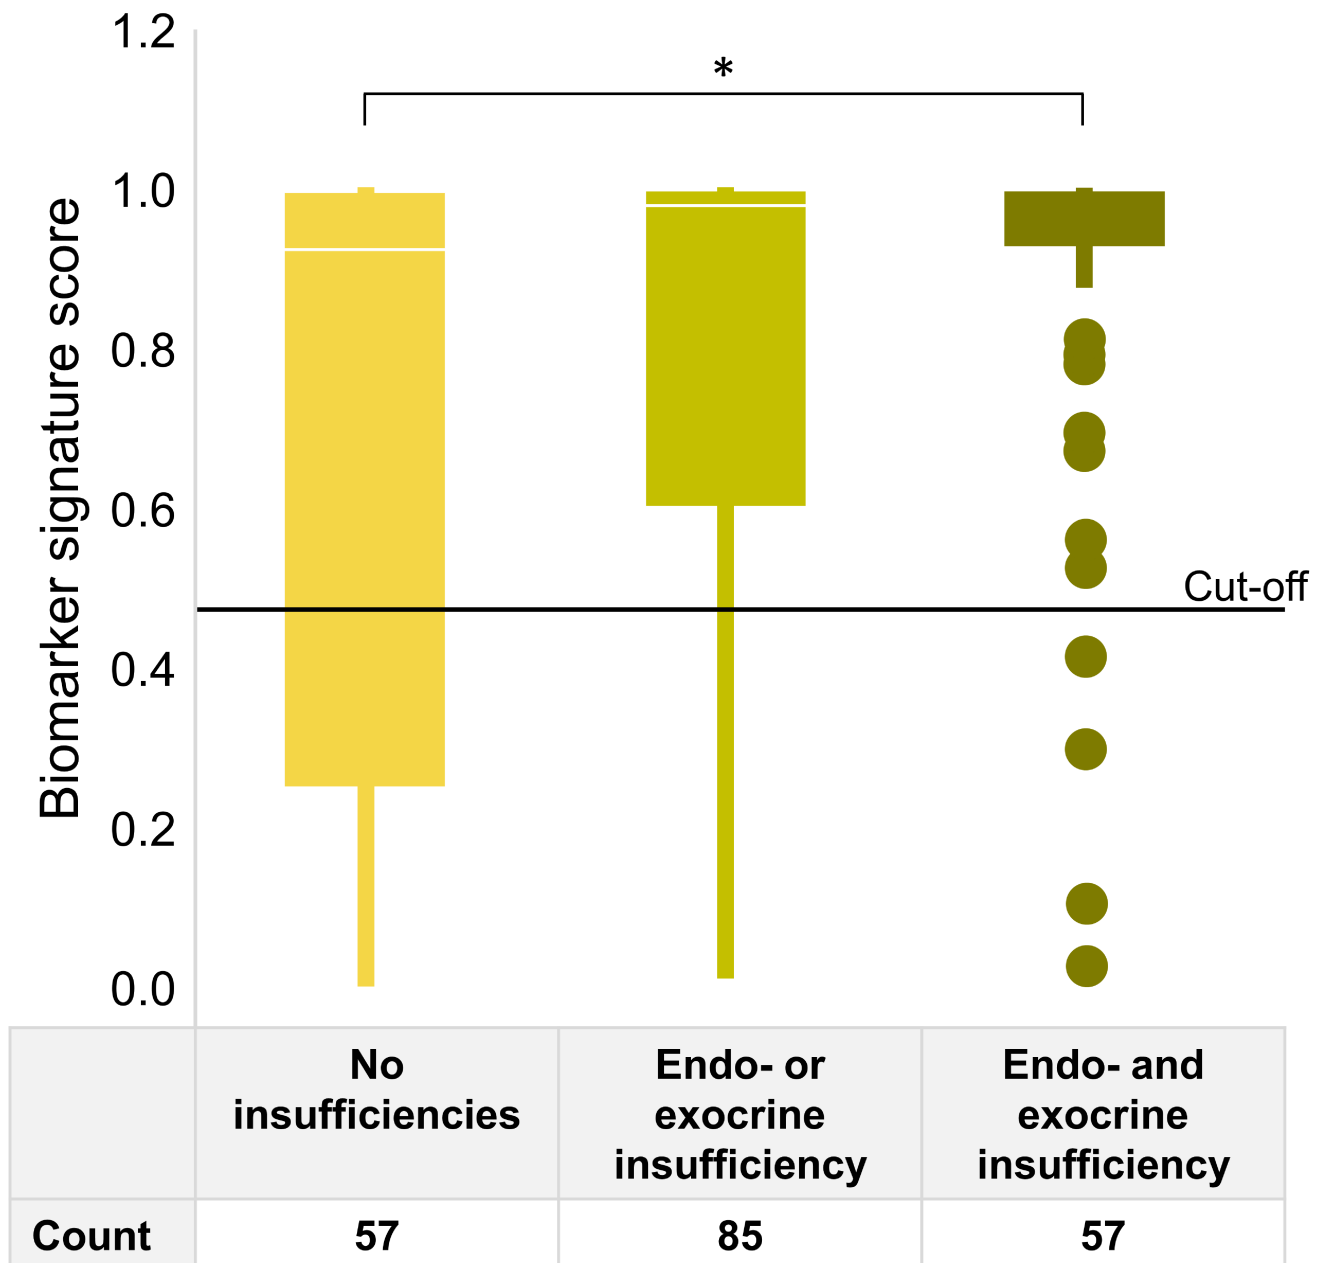

Supplement: gutjnl-2020-320723supp004_data_supplement.pdf [file gutjnl-2020-320723supp004_data_supplement.pdf]
